# Supplementary material
Source: PubMed Central journal article supplement (PMC3623246)
Supplement: AEM.03566-12_zam007134234so1.pdf [file AEM.03566-12_zam007134234so1.pdf]

TABLE S1 Probe and primer sequences used for qPCR

| Primer/Probe               | Sequence                  |
|----------------------------|---------------------------|
| MGB Probe-map <sup>a</sup> | TTGCACTTGATTGTTTCG        |
| F-Primer-map <sup>a</sup>  | CCGATCAACAGGCTCAGTGA      |
| R-Primer-map <sup>a</sup>  | CATGTTGTGCGCTTGGAAAA      |
| MGB Probe-spaC             | CGCACGACTTCGATG           |
| F-Primer-spaC              | GCAGAGATGAACCAGGGAACA     |
| R-Primer-spaC              | AATGACCTGAACTATCGGTGTATGG |

<sup>a</sup> Primers and probe for the hypothetical membrane associated protein, designated to *map*, were developed for a *L. rhamnosus* GG specific PCR.

TABLE S2 Missing genes in genomic islands LGGISL1,2 in *L. rhamnosus* GG product isolates 1 and 2A

| Code                   | Gene  | Start  | End    | Strand | Protein                                                   | P1 | P2A |
|------------------------|-------|--------|--------|--------|-----------------------------------------------------------|----|-----|
| LGG_00383              | is11  | 392315 | 393730 | +      | transposase IS5 family protein                            | 0  | 1   |
| LGG_00384              | -     | 393742 | 393918 | -      | hypothetical protein                                      | 0  | 1   |
| LGG_00385              | -     | 394097 | 394282 | +      | hypothetical protein                                      | 0  | 1   |
| LGG_00386              | -     | 394391 | 395779 | +      | transporter major facilitator superfamily MFS_1           | 0  | 1   |
| LGG_00387              | slyA  | 395755 | 396189 | +      | MarR family transcriptional regulator                     | 0  | 1   |
| LGG_00388              | -     | 396186 | 396746 | +      | hypothetical protein                                      | 0  | 1   |
| LGG_00389              | -     | 396929 | 397144 | +      | hypothetical protein                                      | 0  | 1   |
| LGG_00390              | aroE  | 397288 | 397575 | +      | hypothetical protein                                      | 0  | 1   |
| LGG_00391              | -     | 397793 | 398128 | -      | hypothetical protein                                      | 0  | 1   |
| LGG_00392              | -     | 398232 | 398693 | -      | hypothetical protein                                      | 0  | 1   |
| LGG_00393 <sup>a</sup> | manR  | 399211 | 400695 | +      | transcription antiterminator BglG family protein          | 0  | 1   |
| LGG_00394              | -     | 400685 | 401113 | +      | PTS system transporter su IIA                             | 0  | 1   |
| LGG_00395              | frwA1 | 401179 | 401628 | +      | PTS system fructose-specific transporter su IIA           | 0  | 1   |
| LGG_00396              | frwB1 | 401644 | 401961 | +      | PTS system fructose-specific transporter su IIB           | 0  | 1   |
| LGG_00397              | frwC1 | 401995 | 403095 | +      | PTS system fructose-specific transporter su IIC           | 0  | 1   |
| LGG_00398              | tal   | 403139 | 403807 | +      | Transaldolase                                             | 0  | 1   |
| LGG_00399              | rpe   | 403800 | 404489 | +      | allulose-6-phosphate 3-epimerase                          | 0  | 1   |
| LGG_00400              | ulaA  | 404798 | 405247 | +      | PTS system lactose/cellobiose-specific transporter su IIA | 0  | 1   |
| LGG_00401              | ulaB  | 405249 | 405530 | +      | PTS system lactose/cellobiose-specific transporter su IIB | 0  | 1   |
| LGG_00402              | pts   | 405558 | 405971 | +      | PTS system transporter su IIC                             | 0  | 1   |
| LGG_00403              | is12  | 405976 | 406992 | -      | transposase IS30 family protein                           | 0  | 1   |
| LGG_00404              | ulaC  | 407068 | 408117 | +      | PTS system ascorbate-specific transporter su IIC          | 0  | 1   |
| LGG_00405              | tktN  | 408138 | 408995 | +      | Transketolase                                             | 0  | 1   |
| LGG_00406              | tktC  | 408988 | 410004 | +      | Transketolase                                             | 0  | 1   |
| LGG_00407              | scrK  | 410196 | 411050 | +      | Fructokinase                                              | 0  | 1   |
| LGG_00408              | lacR  | 411100 | 411858 | -      | lactose phosphotransferase system repressor               | 0  | 1   |

|                        |       |        |        |   |                                                 |   |   |
|------------------------|-------|--------|--------|---|-------------------------------------------------|---|---|
| LGG_00409              | frwA2 | 412099 | 412572 | + | PTS system fructose-specific transporter su IIA | 0 | 1 |
| LGG_00410              | frwB2 | 412577 | 412906 | + | PTS system fructose-specific transporter su IIB | 0 | 1 |
| LGG_00411              | frwC2 | 412931 | 414037 | + | PTS system fructose-specific transporter su IIC | 0 | 1 |
| LGG_00412              | is13  | 414201 | 415217 | + | transposase IS30 family protein                 | 1 | 1 |
| LGG_00413              | fba   | 415271 | 416113 | + | fructose-bisphosphate aldolase                  | 1 | 1 |
| LGG_00414              | gatY  | 416135 | 417028 | + | fructose-bisphosphate aldolase                  | 1 | 1 |
| LGG_00415              | pts   | 417573 | 418049 | - | PTS system mannose-specific transporter su IIB  | 1 | 1 |
| LGG_00416              | pts   | 418021 | 418449 | - | PTS system mannose-specific transporter su IIA  | 1 | 1 |
| LGG_00417              | manZ  | 418467 | 420155 | - | PTS system mannose-specific transporter su IICD | 1 | 1 |
| LGG_00418              | tal   | 420195 | 420905 | - | putative transaldolase                          | 1 | 1 |
| LGG_00419              | -     | 421109 | 422140 | + | LacI family transcriptional regulator           | 1 | 1 |
| LGG_00420              | yhfZ  | 422379 | 423293 | + | GntR family transcriptional regulator           | 1 | 1 |
| LGG_00421              | -     | 423326 | 423676 | + | hypothetical protein                            | 1 | 1 |
| LGG_00422              | -     | 423678 | 424040 | + | hypothetical protein                            | 1 | 1 |
| LGG_00423              | -     | 424101 | 425396 | + | membrane protein                                | 1 | 1 |
| LGG_00424              | php   | 425426 | 426310 | + | Hydrolase                                       | 1 | 1 |
| LGG_00425              | yhfS  | 426303 | 427409 | + | pyridoxal phosphate-dependent transferase       | 1 | 1 |
| LGG_00426              | yhfX  | 427400 | 428572 | + | amino acid racemase                             | 1 | 1 |
| LGG_00427 <sup>b</sup> | YHFW  | 428574 | 429803 | + | putative mutase                                 | 1 | 1 |
| LGG_00428              | ilvH  | 430131 | 430967 | + | DNA-directed RNA polymerase su delta            | 1 | 1 |
| LGG_00429              | -     | 431050 | 431610 | + | hypothetical protein                            | 1 | 1 |
| LGG_00430              | cbiO  | 431612 | 433312 | + | cobalt ABC transporter ATP-binding protein cbiO | 1 | 1 |
| LGG_00431              | cbiQ  | 433309 | 434136 | + | cobalt transport protein cbiQ                   | 1 | 1 |
| LGG_00432              | -     | 434102 | 434266 | + | hypothetical protein                            | 1 | 1 |
| LGG_00433 <sup>c</sup> | menC  | 434488 | 435621 | - | N-acylamino acid racemase                       | 1 | 1 |
| LGG_00434              | nagZ  | 436451 | 438265 | + | beta-N-acetylhexosaminidase (GH3)               | 1 | 1 |
| LGG_00435              | is14  | 438735 | 439646 | - | transposase IS30 family protein                 | 1 | 1 |
| LGG_00436              | tnpR  | 439988 | 440638 | + | Resolvase                                       | 1 | 1 |

|                        |       |        |        |   |                                      |   |   |
|------------------------|-------|--------|--------|---|--------------------------------------|---|---|
| LGG_00437              | -     | 440644 | 440928 | + | cytosolic protein                    | 1 | 1 |
| LGG_00438              | -     | 440992 | 441147 | + | hypothetical protein                 | 1 | 1 |
| LGG_00439              | -     | 441189 | 441524 | + | hypothetical protein                 | 1 | 1 |
| LGG_00440              | -     | 442192 | 442404 | + | hypothetical protein                 | 1 | 1 |
| LGG_00441              | srtC1 | 442875 | 443954 | - | sortase family protein               | 1 | 1 |
| LGG_00442              | spaA  | 444028 | 445032 | - | pilus specific protein               | 1 | 1 |
| LGG_00443              | spaB  | 445035 | 445760 | - | pilus specific protein               | 1 | 1 |
| LGG_00444              | spaC  | 445753 | 448440 | - | pilus specific protein               | 1 | 1 |
| LGG_00445              | is15  | 448581 | 449597 | + | transposase IS30 family protein      | 1 | 1 |
| LGG_00446              | -     | 450276 | 450833 | - | hypothetical protein                 | 0 | 1 |
| LGG_00447              | -     | 450928 | 451500 | - | hypothetical protein                 | 0 | 1 |
| LGG_00448              | -     | 451522 | 451797 | - | hypothetical protein                 | 0 | 1 |
| LGG_00449              | -     | 451872 | 453659 | - | UvrD/REP helicase                    | 0 | 1 |
| LGG_00450 <sup>d</sup> | ybjD  | 453656 | 455746 | - | hypothetical protein                 | 0 | 1 |
| LGG_00451              | is16  | 455864 | 457279 | - | transposase IS5 family protein       | 0 | 1 |
| LGG_00452              | is17  | 457654 | 457905 | + | transposase IS3/IS911 family protein | 0 | 1 |
| LGG_00453              | is18  | 457959 | 458750 | + | transposase IS150/IS3 family protein | 0 | 1 |
| LGG_00454              | is19  | 459084 | 459932 | - | transposase IS150/IS3 family protein | 0 | 1 |
| LGG_00455              | -     | 460536 | 460799 | - | hypothetical protein                 | 0 | 1 |
| LGG_00456              | pacL  | 460859 | 463681 | - | cation-transporting ATPase           | 0 | 1 |
| LGG_00457              | is20  | 463990 | 464310 | + | Transposase                          | 0 | 1 |
| LGG_00458              | is21  | 464307 | 464777 | + | transposase IS4 family protein       | 0 | 1 |
| LGG_00459              | napA  | 464786 | 465940 | - | Na/H antiporter                      | 0 | 1 |
| LGG_00460              | is22  | 466447 | 466917 | - | transposase IS4 family protein       | 0 | 1 |
| LGG_00461              | is23  | 466914 | 467234 | - | Transposase                          | 0 | 1 |
| LGG_00462              | is24  | 467284 | 467958 | - | Transposase                          | 0 | 1 |
| LGG_00463              | eriC  | 468801 | 470366 | - | chloride channel protein             | 0 | 1 |
| LGG_00464              | is25  | 470708 | 471628 | + | transposase IS30 family protein      | 0 | 1 |

|           |      |        |        |   |                                                 |   |   |
|-----------|------|--------|--------|---|-------------------------------------------------|---|---|
| LGG_00465 | -    | 471663 | 472916 | - | transporter major facilitator superfamily MFS_1 | 0 | 1 |
| LGG_00466 | is26 | 473096 | 474511 | + | transposase IS5 family protein                  | 0 | 1 |

---

0: gene is present; 1: missing gene; SU: subunit; P1: Product isolate 1; P2A: Product isolate 2A.

<sup>a</sup> Start of LGGISL1.

<sup>b</sup> End of LGGISL1.

<sup>c</sup> Start of LGGISL2.

<sup>d</sup> End of LGGISL2.

TABLE S3 Predicted mutations in ATCC 53103 reference strain and three *L. rhamnosus* GG product isolates

| Position | Mutation             | Annotation <sup>b</sup> | Gene             | Description                                                               | Ref | P1 | P2A | P3 |
|----------|----------------------|-------------------------|------------------|---------------------------------------------------------------------------|-----|----|-----|----|
| 264278   | G→A                  | A420T (GCC→ACC)         | ioIT             | transporter major facilitator superfamily MFS_1, Myo-inositol transporter | 1   | 0  | 0   | 0  |
| 385772   | Δ3 bp                | intergenic (-604/+471)  | is10/LGG_00377   | transposase IS5 family protein/hypothetical protein                       | 0   | 0  | 1   | 0  |
| 615483   | T→C <sup>a</sup>     | S422P (CTG→CCG)         | treB             | PTS system beta-glucoside-specific transporter subunit IIABC              | 1   | 1  | 1   | 1  |
| 656567   | 3 bp x 2             | duplication             | glpD             | alpha-glycerophosphate oxidase                                            | 1   | 0  | 0   | 0  |
| 751632   | 2 bp→GC <sup>a</sup> | intergenic (+65/-193)   | napA/gph         | Na/H antiporter/haloacid dehalogenase-like family hydrolase               | 1   | 1  | 1   | 1  |
| 876404   | 3 bp x 2             | duplication             | cutC             | copper homeostasis protein CutC                                           | 1   | 0  | 0   | 0  |
| 985365   | A→G                  | I904I (ATT→ATC)         | pacL             | cation-transporting ATPase                                                | 0   | 1  | 1   | 0  |
| 1038046  | Δ860 bp              |                         | [LGG_01023]-is36 | [LGG_01023], is35, is36                                                   | 1   | 1  | 1   | 0  |
| 1074976  | G→A                  | E180K (GAA→AAA)         | galU             | UTP-glucose-1-phosphate uridylyltransferase                               | 0   | 1  | 1   | 0  |
| 1118872  | C→T                  | T67T (ACC→ACT)          | LGG_01118        | hypothetical protein                                                      | 0   | 1  | 0   | 0  |
| 1154682  | T→G                  | intergenic (-80/+353)   | LGG_01157/pepD   | transporter major facilitator superfamily MFS_1/dipeptidase A             | 1   | 0  | 0   | 0  |
| 1372183  | T→A                  | L406M (TTG→ATG)         | ycjM             | 2',3'-cyclic-nucleotide 2'-phosphodiesterase                              | 1   | 0  | 0   | 0  |
| 1873058  | A→G                  | P249P (CCT→CCC)         | LGG_01843        | hypothetical protein                                                      | 1   | 1  | 1   | 0  |
| 1873063  | Δ1 bp                | coding (742/795 nt)     | LGG_01843        | hypothetical protein                                                      | 1   | 1  | 1   | 0  |
| 1873071  | +T                   | coding (734/795 nt)     | LGG_01843        | hypothetical protein                                                      | 1   | 1  | 1   | 0  |
| 1873089  | G→A                  | A239V (GCC→GTC)         | LGG_01843        | hypothetical protein                                                      | 1   | 1  | 1   | 0  |
| 1873091  | 2 bp→CA              | coding (713-714/795 nt) | LGG_01843        | hypothetical protein                                                      | 1   | 1  | 1   | 0  |
| 1873110  | 3 bp→TCC             | coding (693-695/795 nt) | LGG_01843        | hypothetical protein                                                      | 0   | 1  | 1   | 0  |
| 1873122  | C→T                  | R228H (CGC→CAC)         | LGG_01843        | hypothetical protein                                                      | 1   | 1  | 1   | 0  |
| 1877309  | Δ1,586 bp            |                         | LGG_01848        | hypothetical protein                                                      | 1   | 1  | 1   | 0  |
| 1877343  | 2 bp→AA              | intergenic (-372/-78)   | LGG_01847/ 01848 | membrane protein/hypothetical protein                                     | 0   | 0  | 0   | 1  |
| 1877348  | G→A                  | intergenic (-377/-74)   | LGG_01847/ 01848 | membrane protein/hypothetical protein                                     | 0   | 0  | 0   | 1  |

|         |                  |                       |                  |                                                                |   |   |   |   |
|---------|------------------|-----------------------|------------------|----------------------------------------------------------------|---|---|---|---|
| 1877374 | C→G              | intergenic (-403/-48) | LGG_01847/ 01848 | membrane protein/hypothetical protein                          | 0 | 0 | 0 | 1 |
| 1883242 | C→A <sup>a</sup> | intergenic (-292/+93) | ABC-SBP/ 01854   | ABC transporter substrate-binding protein/hypothetical protein | 1 | 1 | 1 | 1 |
| 1994717 | T→A              | D903V (GAT→GTT)       | LGG_01953        | hypothetical protein                                           | 1 | 0 | 0 | 0 |
| 2060386 | C→A              | W87L (TGG→TTG)        | gmk              | guanylate kinase                                               | 0 | 1 | 0 | 0 |
| 2150514 | G→T              | intergenic (-99/+336) | LGG_02090/ 02091 | cytosine permease/hypothetical protein                         | 0 | 1 | 0 | 0 |
| 2160010 | G→A              | A459T (GCG→ACG)       | LGG_02095        | type II restriction enzyme methylase subunit                   | 0 | 1 | 1 | 0 |
| 2163622 | T→C              | T636A (ACG→GCG)       | LGG_02097        | type II restriction enzyme methyltransferase                   | 0 | 1 | 1 | 0 |
| 2353548 | G→A <sup>a</sup> | S767F (TCC→TTC)       | LGG_02282        | hypothetical protein                                           | 1 | 1 | 1 | 1 |
| 2452317 | A→G              | Q43Q (CAA→CAG)        | LGG_02375        | hypothetical protein                                           | 1 | 0 | 0 | 0 |

0: no mutation; 1: mutation present; Ref: Reference strain; P1, P2A, P3: Product isolates 1, 2A, 3.

<sup>a</sup> Identification of the same missing genes in all sequenced genomes, including the reference strain, suggests a sequence artifact in the published genome.

<sup>b</sup> Annotation example, first row: Replacement of the reference G at position 264,278 with a A inside the *ioIT* gene. This mutation changes the 420 codon of *ioIT* from GCC to ACC, causing an alanine (A) to threonine (T) substitution in the encoded protein. For more info see *breseq* manual.

TABLE S4 Regions missing one or more entire genes in ATCC 53103 reference strain and three *L. rhamnosus* GG product isolates

| Start           | End             | Size        | Genes <sup>b</sup>                  | Ref | P1 | P2A | P3 |
|-----------------|-----------------|-------------|-------------------------------------|-----|----|-----|----|
| 414206–415277   | 449549–448478   | 33202–35344 | [is13]–[is15]_34 genes <sup>a</sup> | 0   | 1  | 0   | 0  |
| 392237–393747   | 474456–472946   | 79200–82220 | is11–[is26]_84 genes <sup>a</sup>   | 0   | 0  | 1   | 0  |
| 1873127–1873845 | 1873871         | 27–872      | [LGG_01843]–[LGG_01844]             | 1   | 1  | 1   | 1  |
| 2574321         | 2574540–2574399 | 76–305      | [LGG_02511]– [LGG_02512]            | 1   | 1  | 1   | 1  |

0: genes present; 1: missing genes; Ref: Reference strain; P1, P2A, P3: Product isolates 1, 2A, 3.

<sup>a</sup> See Table S3 for annotation of missing genes.

<sup>b</sup> Identification of the same missing genes in all sequenced genomes, including the reference strain, suggests a sequence artifact in the published genome.
